# Supplementary material
Source: Springer Nature journal article supplement (https://www.springermedizin.de/resource/supplementary/12937_2012_671_MOESM2_ESM.pdf/25653874)

# Spontaneous Bowel Movements

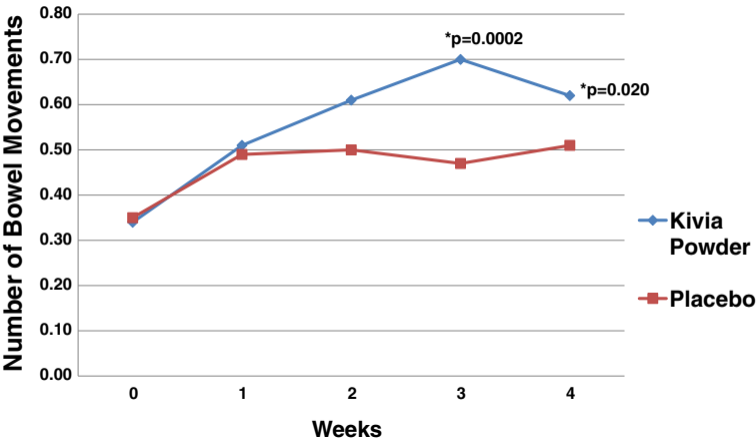

Supplement: MOESM2 [file 25653874]
